# Supplementary material
Source: publisher site journal article supplement (https://www.dovepress.com/get_supplementary_file.php?f=451117.docx)
Supplement: Supplementary file 1 [file get_supplementary_file.php]

**Supplementary A: Distribution of 17 hospitals.**

| **No.** | **Hospital** | **City** | **Cases** |
| --- | --- | --- | --- |
| 1 | Peking University Third Hospital | Beijing | 11 |
| 2 | BeiJing Luhe Hospital, Capital Medical University | Beijing | 111 |
| 3 | Beijing Friendship Hospital, Capital Medical University | Beijing | 90 |
| 4 | First Affiliated Hospital of Hebei North University | Zhangjiakou | 19 |
| 5 | Huabei Petroleum Administration Bureau General Hospital | Renqiu | 50 |
| 6 | People's Hospital of Ningjinxian | Dezhou | 10 |
| 7 | Shenzhen People’s Hospital | Shenzhen | 28 |
| 8 | The First Affiliated Hospital of Soochow University | Suzhou | 47 |
| 9 | Tengzhou Central People's Hospital | Tengzhou | 90 |
| 10 | Tianjin Children's Hospital | Tianjin | 50 |
| 11 | Tieling Women and Infants Hospital | Tieling | 8 |
| 12 | The First Affiliated Hospital of Xi'an Jiaotong University | Xi'an | 84 |
| 13 | Yinan County People's Hospital | Linyi | 31 |
| 14 | People’s Hospital of Yuxi City | Yuxi | 50 |
| 15 | Zaozhuang Municipal Hospital | Zaozhuang | 13 |
| 16 | Datong Third People's Hospital | Datong | 50 |
| 17 | Baoji Central Hospital | Baoji | 72 |
